# Supplementary material
Source: MDPI journal article supplement (https://www.mdpi.com/2077-1312/5/2/18)
Supplement: s1 [file s1]

**Bradshaw et al : SUPPLEMENTARY INFORMATION**

**CONTENTS**

1. Photographs of the experimental set-up (Figure S1)

2. Tables of SIMPER analyses (plankton)

2.1 Phytoplankton (Tables S1-3)

2.2 Zooplankton (Tables S4-9)

3. Abundances of benthic gastropods (Hydrobiidae) at t6 (Figure S2)

4. Results of multiple correlations (benthic-pelagic) (Tables S10, S11)

5. Results of ANOVA analyses (Tables S12-22)

1. **PHOTOGRAPHS OF THE EXPERIMENTAL SET-UP**

| **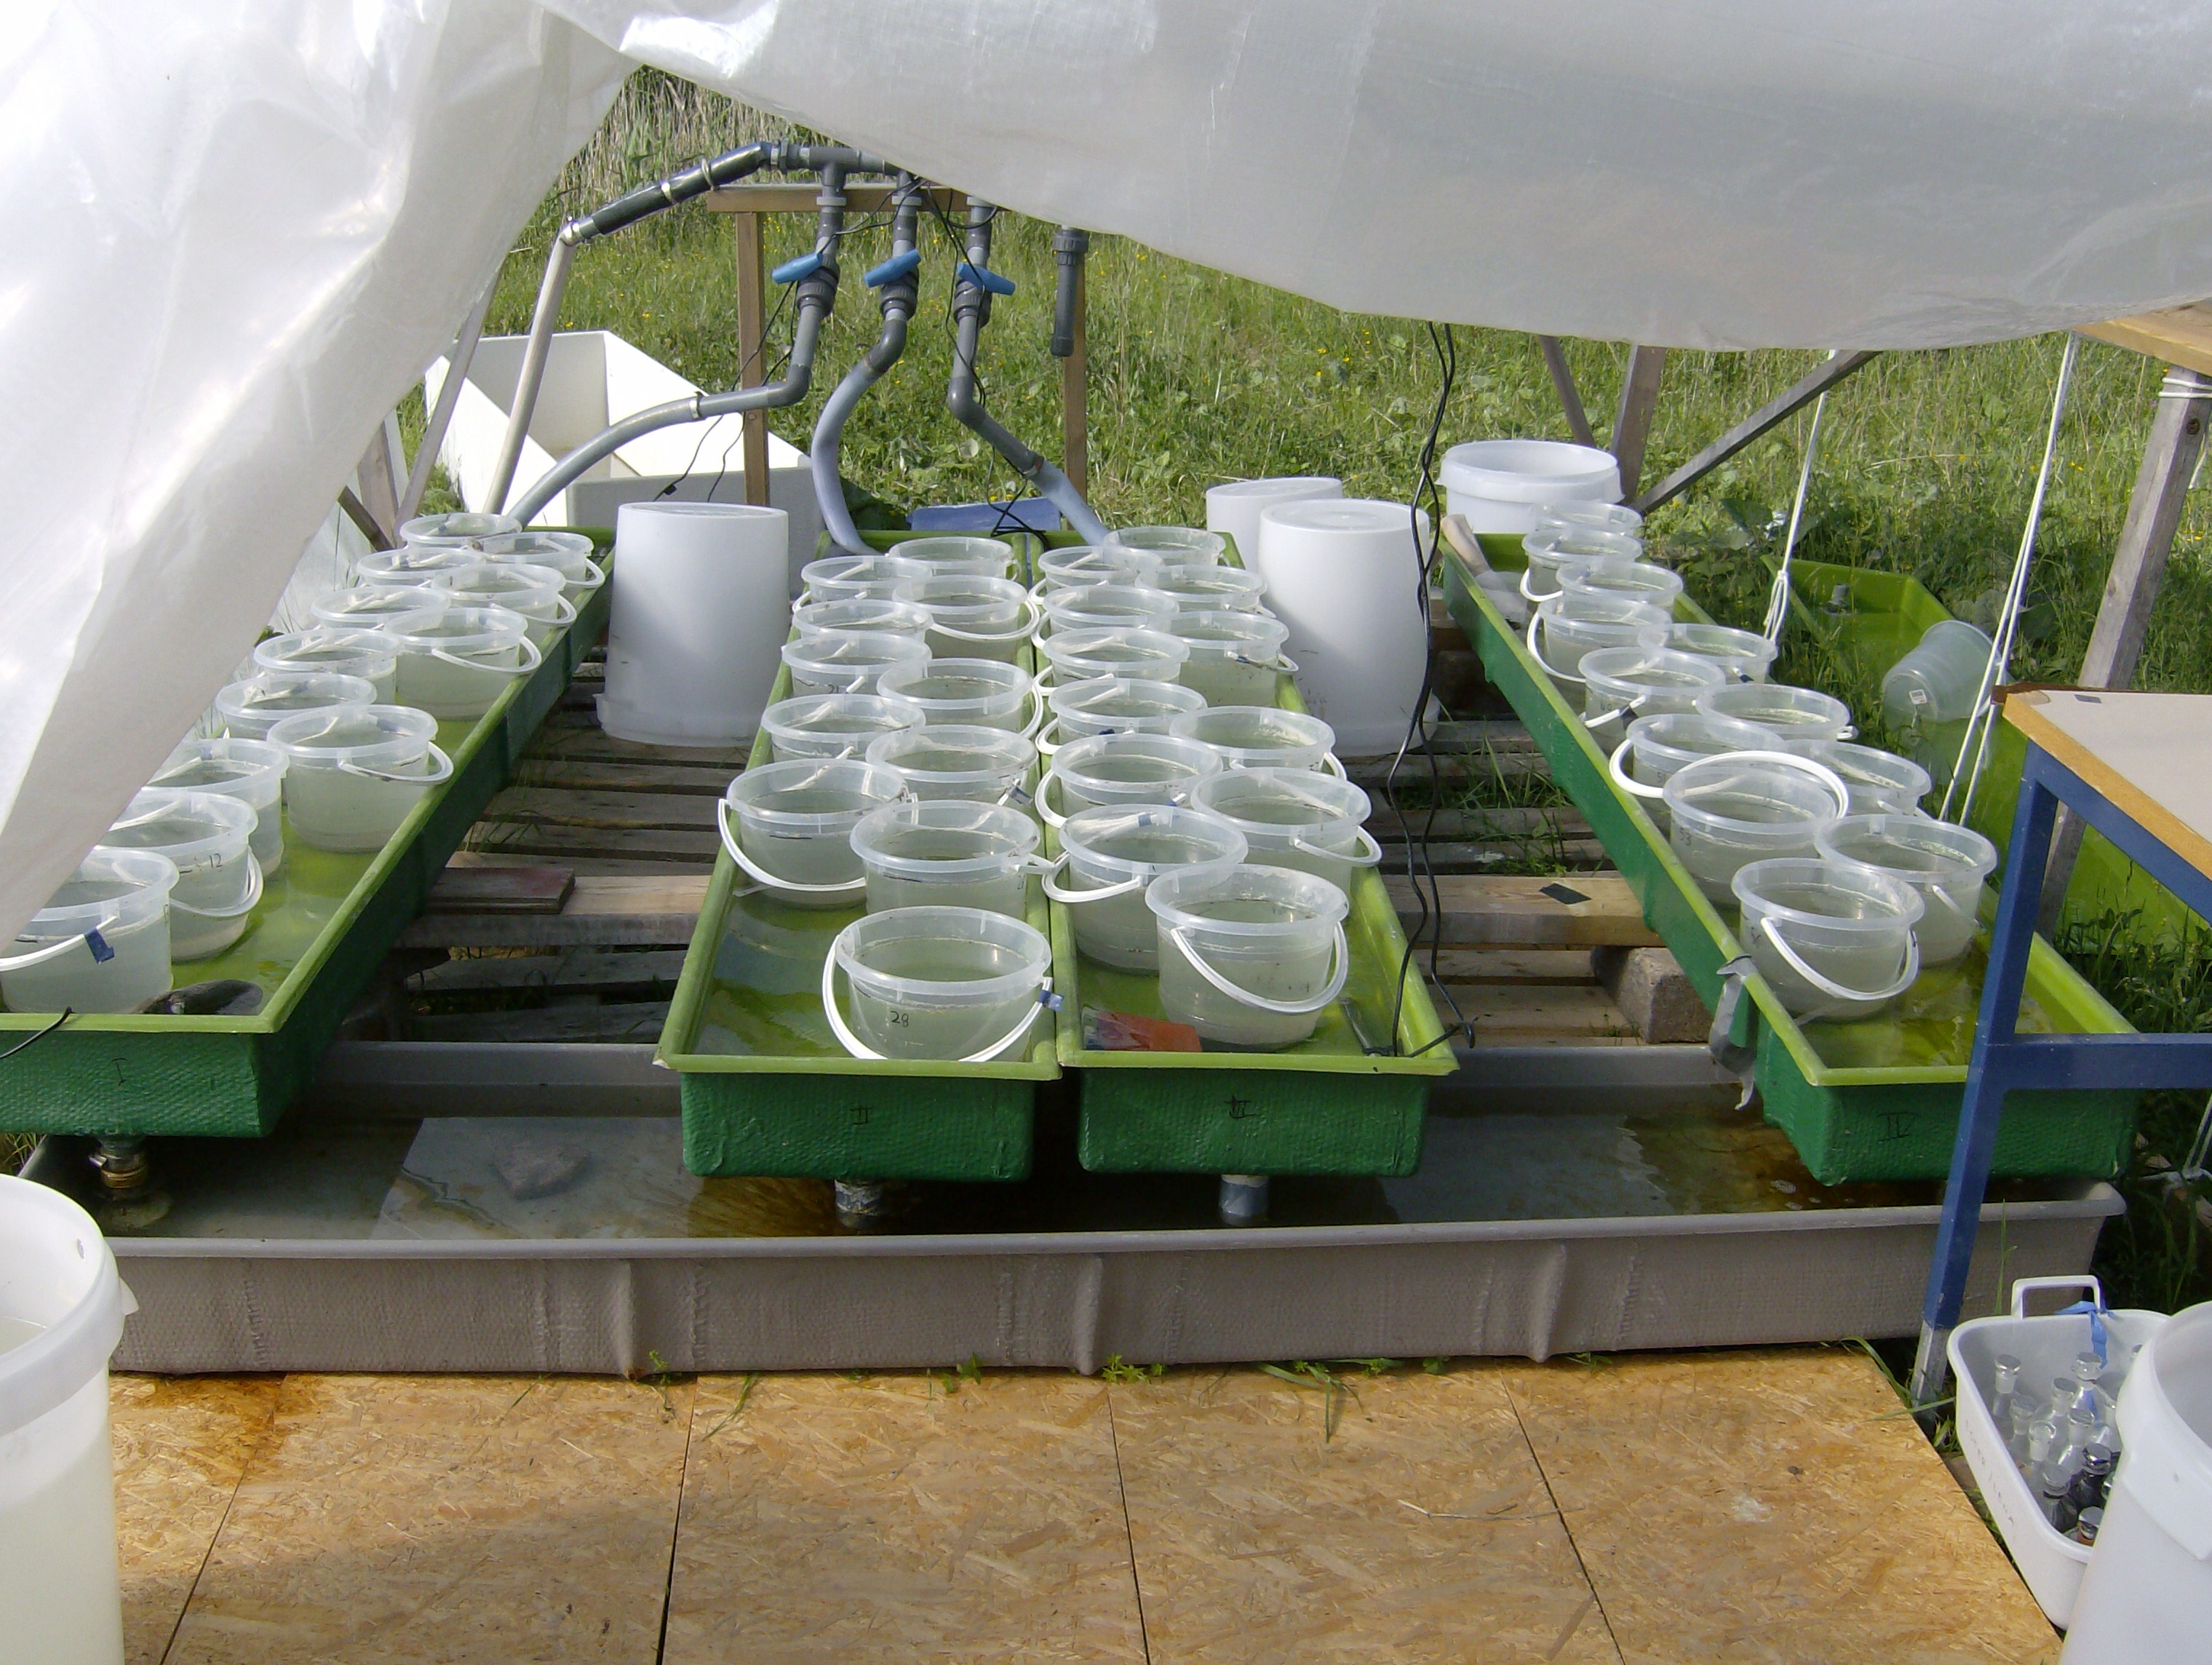** | **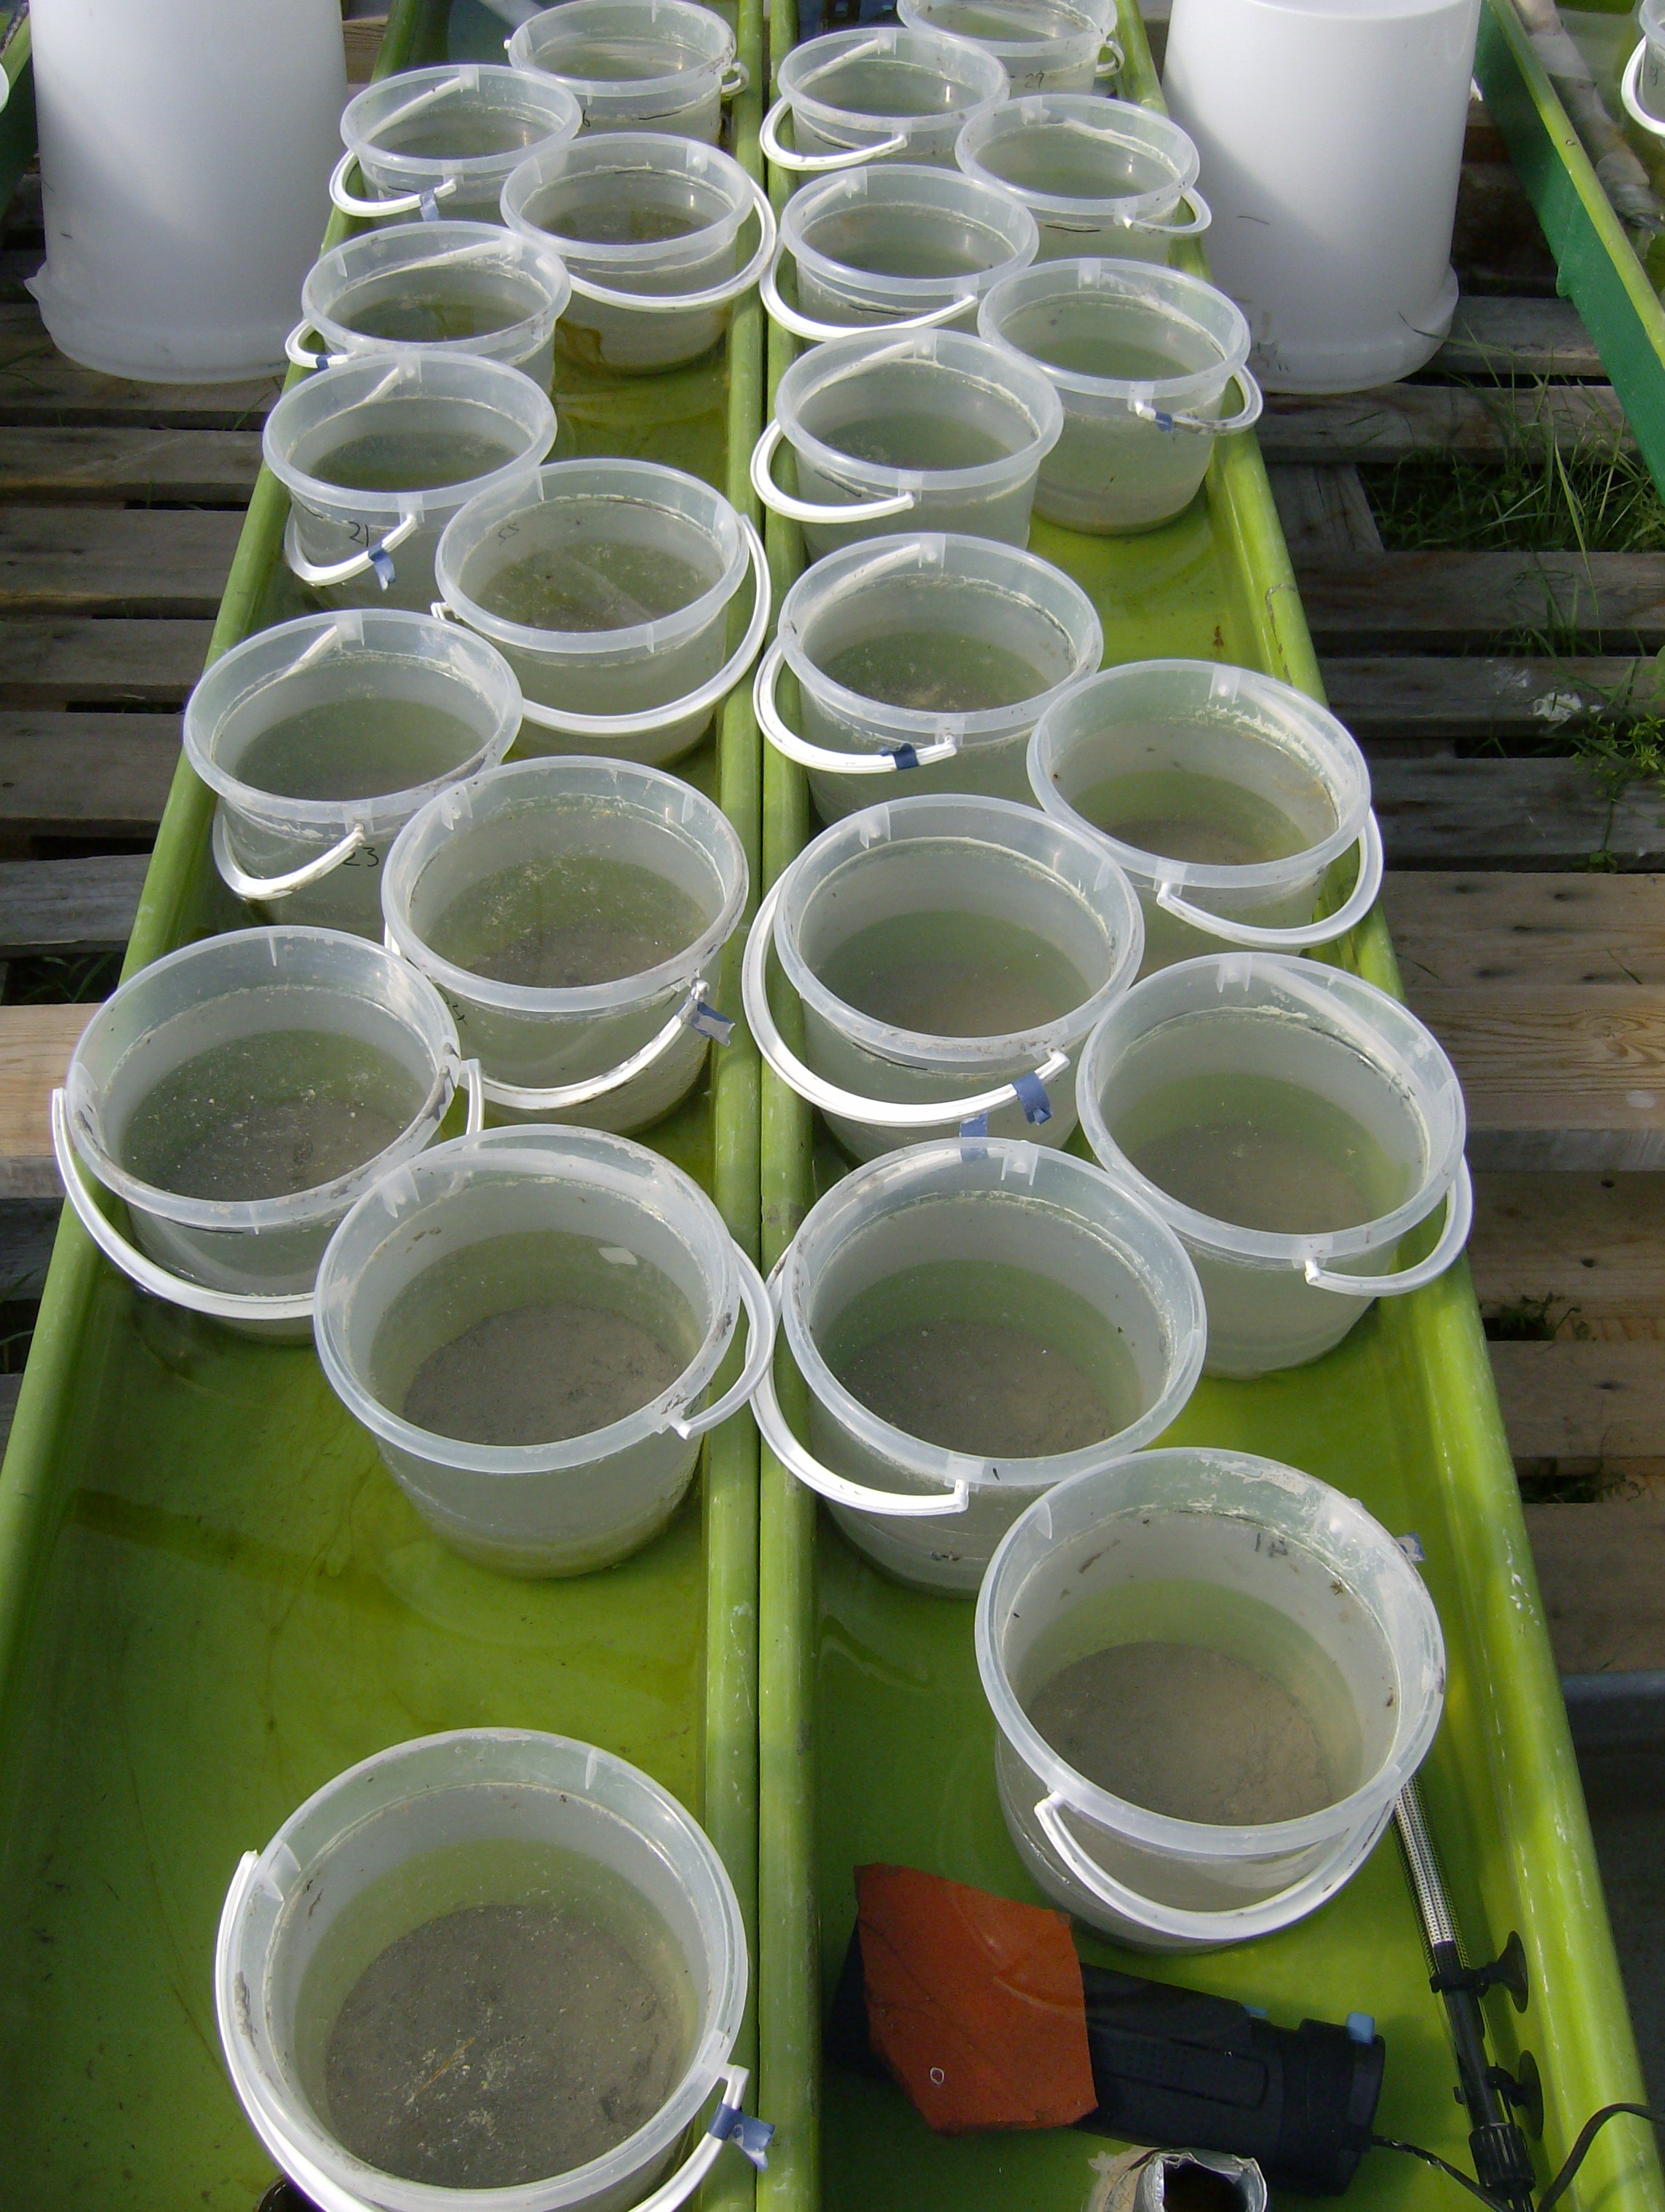** |
| --- | --- |

**Figure S1.** Left: general overview of the whole experiment (edges of the plastic roofing are visible at the top and left of the photograph. Right: closer view of two of the troughs – in the one on the right the water heater and pump are visible.

1. **TABLES OF SIMPER ANALYSES (PLANKTON)**

All tables show the taxa that cumulatively contributed to a 70% dissimilarity between treatments. A = ambient temperature, W = warm, -H = without HBCDD, +H = with HBCDD.

- 1. **PHYTOPLANKTON**

**Table S1.** Results of the similarity percentage (SIMPER) analysis among ambient and warm temperature treatments and phytoplankton taxa abundances (4th root transformed) over all time points.

| **Taxa** | **Average abundances** | | **Cumulative Contributions %** |
| --- | --- | --- | --- |
|  | A | W |
| *Dolichospermum* heterocysts | 10.49 | 22.28 | 20.16 |
| *Pyramimonas* sp. | 18.77 | 9.66 | 40.12 |
| *Dolichospermum* filaments | 10.79 | 19.47 | 57.74 |
| Centric diatom sp. | 10.42 | 11.78 | 72.90 |

**Table S2.** Results of the similarity percentage (SIMPER) analysis among ambient and warm temperature treatments and phytoplankton taxa abundances (4th root transformed) at Day 6.

| **Taxa** | **Average abundances** | | **Cumulative Contributions %** |
| --- | --- | --- | --- |
|  | A | W |
| *Pyramimonas* sp. | 20.26 | 18.35 | 20.10 |
| *Dolichospermum* filaments | 1.79 | 12.10 | 37.70 |
| *Dolichospermum* heterocysts | 1.79 | 12.10 | 55.31 |
| *Melosira* sp. | 30.15 | 36.10 | 72.83 |

**Table S3.** Results of the similarity percentage (SIMPER) analysis among ambient and warm temperature treatment and phytoplankton taxa abundances (4th root transformed) at Day 13.

| **Taxa** | **Average abundances** | | **Cumulative Contributions %** |
| --- | --- | --- | --- |
|  | A | W |
| *Pyramimonas* sp. | 17.42 | 0.00 | 24.76 |
| *Dolichospermum* heterocysts | 18.32 | 33.59 | 46.45 |
| *Dolichospermum* filaments | 18.89 | 27.66 | 63.65 |
| *Melosira* sp. | 36.92 | 30.18 | 79.59 |

- 1. **ZOOPLANKTON**
     1. **ALL TIME POINTS**

**Table S4.** Results of the similarity percentage (SIMPER) analysis among ambient and warm temperature treatments and zooplankton taxa abundances (4th root transformed) at over all time points.

| **Taxa** | **Average abundances** | | **Cumulative Contributions %** |
| --- | --- | --- | --- |
|  | A | W |
| Rotifera | 5.36 | 5.25 | 18.99 |
| Bivalvia larvae | 0.78 | 1.60 | 34.19 |
| Gastropoda larvae | 1.24 | 1.57 | 49.22 |
| Copepod nauplii | 3.10 | 3.76 | 64.11 |
| *Acartia bifilosa* | 1.18 | 1.42 | 74.55 |

**Table S5.** Results of the similarity percentage (SIMPER) analysis with and without HBCDD addition and zooplankton taxa abundances (4th root transformed) including all time points.

| **Taxa** | **Average abundances** | | **Cumulative Contributions %** |
| --- | --- | --- | --- |
|  | -H | +H |
| Rotifera | 5.10 | 5.51 | 19.28 |
| Bivalvia larvae | 0.86 | 1.53 | 34.37 |
| Gastropoda larvae | 1.40 | 1.41 | 49.23 |
| Copepod nauplii | 3.59 | 3.28 | 63.27 |
| *Acartia bifilosa* | 1.06 | 1.54 | 74.18 |

- - 1. **DAY 6**

**Table S6.** Results of the similarity percentage (SIMPER) analysis among ambient and warm temperature treatment and zooplankton taxa abundances (4th root transformed) at day 6.

| **Taxa** | **Average abundances** | | **Cumulative Contributions %** |
| --- | --- | --- | --- |
|  | A | W |
| Gastropoda larvae | 0.17 | 1.82 | 25.67 |
| Rotifera | 5.89 | 6.37 | 40.13 |
| Copepod nauplii | 2.58 | 3.25 | 54.42 |
| *Acartia bifilosa* | 1.39 | 1.55 | 66.53 |
| Bivalvia larvae | 1.19 | 0.87 | 77.97 |

**Table S7.** Results of the similarity percentage (SIMPER) analysis with and without HBCDD addition and zooplankton taxa abundances (4th root transformed) at day 6.

| **Taxa** | **Average abundances** | | **Cumulative Contributions %** |
| --- | --- | --- | --- |
|  | -H | +H |
| Gastropoda larvae | 0.91 | 1.15 | 18.98 |
| Rotifera | 5.74 | 6.50 | 35.43 |
| Bivalvia larvae | 0.63 | 1.38 | 49.70 |
| Copepod nauplii | 3.02 | 2.86 | 63.60 |
| *Acartia bifilosa* | 1.24 | 1.69 | 76.96 |

- - 1. **DAY 13**

**Table S8.** Results of the similarity percentage (SIMPER) analysis among ambient and warm temperature treatment and zooplankton taxa (4th root transformed) abundances at day 13.

| **Taxa** | **Average abundances** | | **Cumulative Contributions %** |
| --- | --- | --- | --- |
|  | A | W |
| Bivalvia larvae | 0.42 | 2.41 | 22.19 |
| Rotifera | 4.88 | 4.01 | 38.18 |
| *Eurytemora affinis* | 1.51 | 2.63 | 51.22 |
| Copepod nauplii | 3.57 | 4.33 | 63.38 |
| Gastropoda larvae | 2.21 | 1.29 | 74.55 |

**Table S9.** Results of the similarity percentage (SIMPER) analysis with and without HBCDD addition and zooplankton taxa abundances (4th root transformed) at day 13.

| **Taxa** | **Average abundances** | | **Cumulative Contributions %** |
| --- | --- | --- | --- |
|  | -H | +H |
| Bivalvia larvae | 1.07 | 1.69 | 17.45 |
| Rotifera | 4.52 | 4.41 | 34.63 |
| *Eurytemora affinis* | 2.22 | 1.83 | 47.38 |
| Copepod nauplii | 4.10 | 3.75 | 60.04 |
| *Acartia bifilosa* | 0.91 | 1.38 | 70.45 |

1. **ABUNDANCES OF BENTHIC GASTROPODS (HYDROBIIDAE) AT T6**

**Figure S2.** Number of Hydrobiidae per cosm on day 6 (average per treatment +/- SE)

1. **RESULTS OF MULTIPLE CORRELATIONS (BENTHIC - PELAGIC)**

**Table S10.** Full results for multiple correlations at t6. Bold numbers are significant values of r (> 0.444)

**Table S11.** Full results for multiple correlations at t13. Bold numbers are significant values of r (> 0.482)

1. **RESULTS OF ANOVA ANALYSES**

In the following tables, * indicates significance (p < 0.05)

| **Table S12.** Pelagic primary production, standardized to A- (Box-Cox transformed data) | | | | | | |
| --- | --- | --- | --- | --- | --- | --- |
|  | df | SS | MS | F | p |
| time | 3 | 6.558 | 2.186 | 3.418 | 0.0229 |
| temperature | 1 | 37.602 | 37.602 | 58.794 | 0.0000 |
| HBCDD | 1 | 0.568 | 0.568 | 0.888 | 0.3499 |
| time*temperature | 3 | 1.394 | 0.465 | 0.727 | 0.5401 |
| time*HBCDD | 3 | 2.759 | 0.920 | 1.438 | 0.2407 |
| temperature*HBCDD | 1 | 2.064 | 2.064 | 3.227 | 0.0775 |
| time*temperature*HBCDD | 3 | 3.495 | 1.165 | 1.822 | 0.1529 |
| Error | 60 | 38.374 | 0.640 |  |  |
| Total | 75 | 94.189 |  |  |  |
|  |  |  |  |  |  |
| **Table S13.** Total N (µg/L) in the water (Box Cox transformed) | | | | |  |
|  | df | SS | MS | F | p |
| time | 2 | 0.049 | 0.025 | 11.194 | 0.0001 |
| temperature | 1 | 0.008 | 0.008 | 3.834 | 0.0562 |
| HBCDD | 1 | 0.000 | 0.000 | 0.002 | 0.9636 |
| time*temperature | 2 | 0.012 | 0.006 | 2.779 | 0.0723 |
| time*HBCDD | 2 | 0.000 | 0.000 | 0.006 | 0.9937 |
| temperature*HBCDD | 1 | 0.001 | 0.001 | 0.297 | 0.5886 |
| time*temperature*HBCDD | 2 | 0.002 | 0.001 | 0.357 | 0.7018 |
| Error | 47 | 0.104 | 0.002 |  |  |
| Total | 58 | 0.176 |  |  |  |
|  |  |  |  |  |  |
| **Table S14.** PO4 (µg/L) in the water (Box Cox transformed) | | | | |  |
|  | df | SS | MS | F | p |
| time | 2 | 4.343 | 2.172 | 80.408 | 0.0000 |
| temperature | 1 | 0.309 | 0.309 | 11.426 | 0.0015 |
| HBCDD | 1 | 0.005 | 0.005 | 0.176 | 0.6763 |
| time*temperature | 2 | 3.964 | 1.982 | 73.379 | 0.0000 |
| time*HBCDD | 2 | 0.103 | 0.051 | 1.906 | 0.1600 |
| temperature*HBCDD | 1 | 0.011 | 0.011 | 0.420 | 0.5201 |
| time*temperature*HBCDD | 2 | 0.007 | 0.003 | 0.121 | 0.8861 |
| Error | 47 | 1.269 | 0.027 |  |  |
| Total | 58 | 10.038 |  |  |  |
|  |  |  |  |  |  |
| **Table S15.** Benthic primary production, standardized to A- treatment (untransformed) | | | | | |
|  | df | SS | MS | F | p |
| time | 1 | 1.72424 | 1.72424 | 17.5178 | 0.0002 |
| temperature | 1 | 4.83362 | 4.83362 | 49.1084 | 0.0000 |
| HBCDD | 1 | 0.00927 | 0.00927 | 0.0941 | 0.7610 |
| time*temperature | 1 | 1.77795 | 1.77795 | 18.0636 | 0.0002 |
| time*HBCDD | 1 | 0.07580 | 0.07580 | 0.7701 | 0.3867 |
| temperature*HBCDD | 1 | 0.02046 | 0.02046 | 0.2079 | 0.6515 |
| time*temperature*HBCDD | 1 | 0.08738 | 0.08738 | 0.8878 | 0.3531 |
| Error | 32 | 3.14968 | 0.09843 |  |  |
| Total | 39 | 11.67840 |  |  |  |
|  |  |  |  |  |  |
| **Table S16.** Number of nematodes at t13 (untransformed) | | | | |  |
|  | df | SS | MS | F | p |
| temperature | 1 | 27720 | 27720 | 1.674 | 0.2153 |
| HBCDD | 1 | 360 | 360 | 0.022 | 0.8847 |
| temperature*HBCDD | 1 | 10506 | 10506 | 0.635 | 0.4381 |
| Error | 15 | 248355 | 16557 |  |  |
| Total | 18 | 288968 |  |  |  |
|  |  |  |  |  |  |
| **Table S17.** Number of Turbellaria at t13 (untransformed) | | | | |  |
|  | df | SS | MS | F | p |
| temperature | 1 | 230.59 | 230.59 | 0.59024 | 0.4543 |
| HBCDD | 1 | 0.00 | 0.00 | 0.00000 | 1.0000 |
| temperature*HBCDD | 1 | 1882.35 | 1882.35 | 4.81831 | 0.0443 |
| Error | 15 | 5860.00 | 390.67 |  |  |
| Total | 18 | 8060.53 |  |  |  |
|  |  |  |  |  |  |
| **Table S18.** Number of *Microarthridion littorale* at t13 (square root transformed) | | | | | |
|  | df | SS | MS | F | p |
| temperature | 1 | 0.524 | 0.524 | 0.269 | 0.6118 |
| HBCDD | 1 | 0.524 | 0.524 | 0.269 | 0.6118 |
| temperature*HBCDD | 1 | 11.505 | 11.505 | 5.897 | 0.0282 |
| Error | 15 | 29.265 | 1.951 |  |  |
| Total | 18 | 42.392 |  |  |  |
|  |  |  |  |  |  |
| **Table S19.** Biomass (gdw) of *Limecola balthica* at t6 (untransformed) | | | | | |
|  | df | SS | MS | F | p |
| temperature | 1 | 0.00000 | 0.00000 | 0.044 | 0.8372 |
| HBCDD | 1 | 0.00000 | 0.00000 | 0.027 | 0.8715 |
| temperature*HBCDD | 1 | 0.00011 | 0.00011 | 1.877 | 0.1896 |
| Error | 16 | 0.00091 | 0.00006 |  |  |
| Total | 19 | 0.00102 |  |  |  |
|  |  |  |  |  |  |
| **Table S20.** Biomass (gdw) of *Limecola balthic*a at t13 (untransformed) | | | | | |
|  | df | SS | MS | F | p |
| temperature | 1 | 0.00001 | 0.00001 | 0.081 | 0.7800 |
| HBCDD | 1 | 0.00009 | 0.00009 | 0.649 | 0.4329 |
| temperature*HBCDD | 1 | 0.00002 | 0.00002 | 0.183 | 0.6748 |
| Error | 15 | 0.00198 | 0.00013 |  |  |
| Total | 18 | 0.00210 |  |  |  |
|  |  |  |  |  |  |
| **Table S21.** Number of Hydrobiidae at t6 (untransformed) | | | | |  |
|  | df | SS | MS | F | p |
| temperature | 1 | 0.000 | 0.000 | 0.000 | 1.0000 |
| HBCDD | 1 | 24.200 | 24.200 | 1.225 | 0.2847 |
| temperature*HBCDD | 1 | 9.800 | 9.800 | 0.496 | 0.4913 |
| Error | 16 | 316.000 | 19.750 |  |  |
| Total | 19 | 350.000 |  |  |  |
|  |  |  |  |  |  |
| **Table S22.** Total number of meiofauna at t13 (untransformed) | | | | |  |
|  | df | SS | MS | F | p |
| temperature | 1 | 46730 | 46730 | 2.691 | 0.1217 |
| HBCDD | 1 | 172 | 172 | 0.010 | 0.9220 |
| temperature*HBCDD | 1 | 15803 | 15803 | 0.910 | 0.3553 |
| Error | 15 | 260512 | 17367 |  |  |
| Total | 18 | 326536 |  |  |  |
